# Supplementary material for: Structure confirmation, reactivity, bacterial mutagenicity and quantification of 2,2,4-tribromo-5-hydroxycyclopent-4-ene-1,3-dione in drinking water
Source: Springer Nature journal article supplement (doi:10.1038/s42004-024-01356-3), 2024-11-14
Supplement: MOESM1 [file 42004_2024_1356_MOESM1_ESM.pdf]

## **Supplementary information**

### **STRUCTURE CONFIRMATION, REACTIVITY, BACTERIAL MUTAGENICITY AND QUANTIFICATION OF 2,2,4-TRIBROMO-5-HYDROXYCYCLOPENT-4-ENE-1,3-DIONE IN DRINKING WATER**

Davide Ciccarelli<sup>a,b</sup>, Ben M. J. Lancaster<sup>c</sup>, D. Christopher Braddock<sup>c</sup>, Matteo Calvaresi<sup>d</sup>, Miroslav Mišík<sup>e</sup>, Siegfried Knasmüller<sup>e</sup>, Edoardo Jun Mattioli<sup>d</sup>, Francesco Zerbetto<sup>d</sup>, Andrew J. P. White<sup>c</sup>, Tim Marczylo<sup>b,f</sup>, Timothy W. Gant<sup>b,f</sup>, Leon P. Barron<sup>a,b,f\*</sup>

<sup>a</sup> *Environmental Research Group, MRC Centre for Environment and Health, School of Public Health, Imperial College London, 86 Wood Lane, London W12 0BZ, UK*

<sup>b</sup> *NIHR-HPRU Chemical and Radiation Threats and Hazards, NIHR-HPRU Environmental Exposures and Health, MRC Centre for Environment and Health, School of Public Health, Imperial College London, 86 Wood Lane, London W12 0BZ, UK*

<sup>c</sup> *Department of Chemistry, Imperial College London, 82 Wood Lane, London W12 0BZ, UK*

<sup>d</sup> *Dipartimento di Chimica “Giacomo Ciamician”, Alma Mater Studiorum – Università di Bologna, Via Francesco Selmi 2, 40126 Bologna, Italy*

<sup>e</sup> *Medical University of Vienna, Center for Cancer Research, Borschkegasse 8a, 1090 Vienna, Austria*

<sup>f</sup> *UK Health Security Agency, Harwell Science Campus, Oxon, OX11 0RQ, United Kingdom*

\*Email. [leon.barron@imperial.ac.uk](mailto:leon.barron@imperial.ac.uk)

## Summary

The materials employed for the work reported in the paper are listed below and grouped on the base of suppliers. The details of the instruments used for the characterization of the compound after synthesis are reported, as well as the details of X-ray Crystal structure of 2,2,4-tribromo-5-hydroxycyclopent-4-ene-1,3-dione characterization and the cartesian coordinates of optimized structure for bond dissociation enthalpies and energies calculations. Toxicity predictions for potential isomers of 2,2,4-tribromo-5-hydroxycyclopent-4-ene-1,3-dione are reported. Supplementary figures and tables are included below.

## Materials

Becton Dickinson and Company (Sparks, US): Bacto Agar.

Lancaster Synthesis (Ward Hill, USA): diethyl oxalate.

Merck (Darmstadt, Germany): Lightsafe 15 mL centrifuge tubes.

Oxoid (Basingstoke, Great Britain): Nutrient Broth II

Phenomenex (San Juan, USA): clear glass vials with polyethylene caps.

Sigma-Aldrich (Steinheim, Germany): ammonium bicarbonate, diethylamine puriss. ( $\geq 99.5\%$ ), diethyl-1,3-acetonedicarboxylate (96%), ethyl acetate and bromine (reagent grade), ammonium hydroxide  $>25\%$ , sodium dihydrogen phosphate hydrate, disodium hydrogen phosphate, ammonium sodium phosphate dibasic tetrahydrate, potassium phosphate dibasic, magnesium sulphate heptahydrate, magnesium chloride hexahydrate, sodium chloride, sodium sulphate, dimethyl sulfoxide, glucose, L-histidine, D-biotin, glucose 6-phosphate, citric acid, nicotinamide adenine dinucleotide phosphate, tetracyclin, ampicilin, 2,4,7-trinitro-9-fluorenone, 2-aminoanthracene, sodium azide, methylmethansulfonate, crystal violet, 2,2,6,6-tetramethylpiperidine 1-oxyl and amber glass vials with PTFE/silicone septum caps.

Thermo Fisher Scientific (Waltham, USA): acetonitrile and acetic acid LC-MS grade, diethyl ether, trichloromethane, potassium (mineral oil, 98%), dimethyl sulfoxide.

Toronto Research Chemicals (North York, Canada): dibromomethanesulfonic acid 98%.

TRINOVA Biochem (Giessen, Germany): S9 SD rat liver homogenate.

VWR (Radnor, USA): ultrapure water and methanol LC-MS grade, ethanol, acetone, magnesium sulphate (dried), sulphuric acid 95% and hydrochloric acid 37%.

Waters (Tampa, USA): Atlantis Premier BEH C18 AX column (2.5  $\mu\text{m}$ , 2.1x100mm).

Strains TA98, TA100 and TA102 were obtained as a gift from T. Grummt (German Environmental Protection Agency, Bad Elster, Germany).

#### **Instrumentation for 2,2,4-tribromo-5-hydroxycyclopent-4-ene-1,3-dione characterization**

$^1\text{H}$  NMR and  $^{13}\text{C}\{^1\text{H}\}$  NMR spectra were recorded on a Bruker AV-400 and AV-500 (Billerica, United States).  $^1\text{H}$  NMR spectra were recorded at 400 MHz.  $^{13}\text{C}\{^1\text{H}\}$  NMR spectra were recorded at 101 MHz or 126 MHz. Fourier transform infrared (IR) spectra were recorded neat using an Agilent ATR-FTIR spectrometer (Santa Clara, United States). Mass spectra were recorded by the Imperial College Department of Chemistry Mass Spectroscopy Service employing a Thermo Scientific Scientific Q-Exactive instrument. X-Ray crystallography studies were conducted by the Chemical Crystallography Laboratory in the Department of Chemistry at Imperial College London using an Agilent Xcalibur 3 E diffractometer. Melting points were recorded on an OptiMelt MPA100 (Stanford Research Systems, Sunnyvale, USA). Elemental analysis was performed in duplicate by Elemental Microanalysis Ltd, (1 Hameldown Road, Okehampton, Devon, EX20 1UB, UK), employing CE Instruments (Wigan, United Kingdom) elemental analyzer model EA1110, and a Dionex ICS1000 ion chromatograph (Sunnyvale, USA).

### **X-ray crystal structure of 2,2,4-tribromo-5-hydroxycyclopent-4-ene-1,3-dione**

*Crystal data for TBHCD:* C<sub>5</sub>HBr<sub>3</sub>O<sub>3</sub>, *M* = 348.79, monoclinic, *P*2<sub>1</sub> (no. 4), *a* = 6.7063(4), *b* = 6.9943(4), *c* = 8.7513(5) Å, β = 90.237(6)°, *V* = 410.48(4) Å<sup>3</sup>, *Z* = 2, *D*<sub>c</sub> = 2.822 g cm<sup>-3</sup>, μ(Mo-Kα) = 14.693 mm<sup>-1</sup>, *T* = 173 K, colourless platy needles, Agilent Xcalibur 3 E diffractometer; 1759 independent measured reflections (*R*<sub>int</sub> = 0.0414), *F*<sup>2</sup> refinement,<sup>[X1,X2,X3]</sup> *R*<sub>1</sub>(obs) = 0.0310, *wR*<sub>2</sub>(all) = 0.0606, 1678 independent observed absorption-corrected reflections [*|F<sub>o</sub>*| > 4σ(*|F<sub>o</sub>*)], completeness to θ<sub>full</sub>(25.2°) = 99.9%, 103 parameters. The absolute structure of TBHCD was determined by use of the Flack parameter [*x*<sup>+</sup> = -0.168(19)]. CCDC 2307874.

The crystal of TBHCD that was studied was modelled as a two component twin in a *ca.* 75:25 ratio, with the two major lattices related by the twin law [1 0 0 0 -1 0 0 0 -1]. The presumed O4-H hydrogen atom could not be located from Δ*F* maps, and so it was added in an idealised position with an O-H distance of 0.90 Å and allowed to rotate about the C-O vector to find the best fit with the observed electron density (the SHELX HFIX/AFIX 147 command). The absolute structure of TBHCD was determined by use of the Flack parameter [*x*<sup>+</sup> = -0.168(19)].

#### References:

- [X1] O.V. Dolomanov, L.J. Bourhis, R.J. Gildea, J.A.K. Howard, H. Puschmann, *J. Appl. Cryst.*, 2009, **42**, 339-341.
- [X2] SHELXTL v5.1, Bruker AXS, Madison, WI, 1998.
- [X3] SHELX-2013, G.M. Sheldrick, *Acta Cryst.*, 2015, **C71**, 3-8.

### **Toxicity prediction of potential isomers of 2,2,4-tribromo-5-hydroxycyclopent-4-ene-1,3-dione**

The potential mutagenicity of three potential isomers of 2,2,4-tribromo-5-hydroxycyclopent-4-ene-1,3-dione was predicted with EPA TEST. Software, employing the nearest neighbour method. 4,5,5-tribromo-3-hydroxycyclopent-3-ene-1,2-dione, 3,5,5-tribromo-4-hydroxycyclopent-3-ene-1,2-dione, and 3,4,5-tribromo-5-hydroxycyclopent-3-ene-1,2-dione were all predicted as mutagenic.

## Cartesian coordinates of optimized structure for bond dissociation enthalpies and energies calculations

-----  
Gas-Phase  
-----

Br

E(UB3LYP)= -2574.10577714

G3 Enthalpy= -2573.516891

G3 Free Energy= -2573.536081

Br 0.000000 0.000000 0.000000

Cl

E(UB3LYP)= -460.166882396

G3 Enthalpy= -459.990383

G3 Free Energy= -460.008421

Cl 0.000000 0.000000 0.000000

*N*-Bromosuccinimide

E(RB3LYP)= -2934.279525

G3 Enthalpy= -2933.370668

G3 Free Energy= -2933.411610

N -0.099298 0.405858 0.270263

C 0.119789 -0.349781 1.435927

C 1.520223 0.005806 1.919244

C 2.066864 1.033269 0.915384

C 0.965503 1.238890 -0.117085

O -0.659943 -1.117020 1.929992

H 2.107861 -0.913053 1.965112

H 1.441027 0.391571 2.937391

|    |           |          |           |
|----|-----------|----------|-----------|
| H  | 2.964383  | 0.696586 | 0.393075  |
| H  | 2.296795  | 2.001160 | 1.364880  |
| O  | 0.977506  | 1.959455 | -1.076972 |
| Br | -1.691426 | 0.310237 | -0.694791 |

Succinimide

E(UB3LYP)= -360.072907

G3 Enthalpy= -359.746710

G3 Free Energy= -359.784122

|   |           |           |           |
|---|-----------|-----------|-----------|
| N | -0.218803 | 0.681947  | 0.487405  |
| C | 0.121598  | -0.319545 | 1.415684  |
| C | 1.528462  | 0.013143  | 1.934367  |
| C | 2.077215  | 1.041933  | 0.926515  |
| C | 0.943597  | 1.221931  | -0.093952 |
| O | -0.581792 | -1.238460 | 1.744562  |
| H | 2.102295  | -0.913849 | 1.980742  |
| H | 1.446870  | 0.402079  | 2.951316  |
| H | 2.967776  | 0.708822  | 0.391102  |
| H | 2.305176  | 2.010798  | 1.375394  |
| O | 1.008315  | 1.743942  | -1.175925 |

2,2,4-tribromo-5-hydroxycyclopent-4-ene-1,3-dione

E(RB3LYP)= -8138.832713

G3 Enthalpy= -8136.760285

G3 Free Energy= -8136.811384

|   |           |           |           |
|---|-----------|-----------|-----------|
| C | -0.290040 | 0.501774  | 0.099193  |
| C | 0.105800  | -0.506212 | 1.184600  |
| C | 1.513951  | -0.118117 | 1.676319  |
| C | 1.867968  | 1.024768  | 0.913016  |
| C | 0.902555  | 1.477091  | -0.032415 |

|    |           |           |           |
|----|-----------|-----------|-----------|
| O  | -0.556795 | -1.427253 | 1.581777  |
| O  | 2.111345  | -0.737338 | 2.548956  |
| Br | 3.530287  | 1.914469  | 1.125517  |
| O  | 0.933333  | 2.415654  | -0.813366 |
| Br | -0.618356 | -0.435374 | -1.626549 |
| Br | -1.937295 | 1.482768  | 0.635684  |

2,4-dibromo-5-hydroxycyclopent-4-ene-1,3-dione

E(UB3LYP)= -5564.658560

G3 Enthalpy= -5563.159446

G3 Free Energy= -5563.208855

|    |           |           |           |
|----|-----------|-----------|-----------|
| C  | -0.304662 | 0.733733  | 0.494344  |
| C  | 0.044465  | -0.357270 | 1.356396  |
| C  | 1.572783  | -0.173151 | 1.636973  |
| C  | 1.941040  | 1.004179  | 0.906684  |
| C  | 0.824602  | 1.608999  | 0.180479  |
| O  | -0.637190 | -1.262989 | 1.811335  |
| O  | 2.240331  | -0.915993 | 2.340262  |
| Br | 3.684406  | 1.722502  | 0.867835  |
| O  | 0.833252  | 2.614208  | -0.526030 |
| Br | -2.038974 | 1.033577  | -0.182918 |

2,4-dibromo-2-chloro-5-hydroxycyclopent-4-ene-1,3-dione E(UB3LYP)= -6024.911648

G3 Enthalpy= -6023.253760

G3 Free Energy= -6023.303506

|   |           |           |           |
|---|-----------|-----------|-----------|
| C | -0.299050 | 0.514460  | 0.088345  |
| C | 0.109880  | -0.504917 | 1.162146  |
| C | 1.491965  | -0.082830 | 1.693318  |
| C | 1.855307  | 1.046522  | 0.913271  |
| C | 0.905889  | 1.476109  | -0.057212 |

|    |           |           |           |
|----|-----------|-----------|-----------|
| O  | -0.524446 | -1.466866 | 1.505269  |
| O  | 2.074002  | -0.677443 | 2.593670  |
| Br | 3.510366  | 1.947772  | 1.139736  |
| O  | 0.950145  | 2.388251  | -0.868604 |
| Cl | -0.695750 | -0.294662 | -1.475212 |
| Br | -1.906590 | 1.531394  | 0.721200  |

4-bromo-2-chloro-5-hydroxycyclopent-4-ene-1,3-dione E(UB3LYP)= -3450.737407

G3 Enthalpy= -3449.653242

G3 Free Energy= -3449.701239

|    |           |           |           |
|----|-----------|-----------|-----------|
| C  | -0.293461 | 0.739482  | 0.480260  |
| C  | 0.054607  | -0.344826 | 1.350955  |
| C  | 1.578207  | -0.154065 | 1.640931  |
| C  | 1.948353  | 1.019391  | 0.904908  |
| C  | 0.836805  | 1.615595  | 0.168625  |
| O  | -0.633830 | -1.247032 | 1.805226  |
| O  | 2.244149  | -0.891124 | 2.352648  |
| Br | 3.690762  | 1.742245  | 0.873356  |
| O  | 0.840081  | 2.616618  | -0.544970 |
| Cl | -1.879784 | 1.005107  | -0.150461 |

2-bromo-2,4-dichloro-5-hydroxycyclopent-4-ene-1,3-dione

E(UB3LYP)= -3910.990559

G3 Enthalpy= -3909.747097

G3 Free Energy= -3909.795450

|   |           |           |           |
|---|-----------|-----------|-----------|
| C | -0.303935 | 0.511436  | 0.087370  |
| C | 0.104141  | -0.507472 | 1.162345  |
| C | 1.484603  | -0.088600 | 1.690221  |
| C | 1.848300  | 1.042210  | 0.912569  |
| C | 0.897942  | 1.472056  | -0.056694 |

|    |           |           |           |
|----|-----------|-----------|-----------|
| O  | -0.534006 | -1.466945 | 1.507448  |
| O  | 2.072504  | -0.680592 | 2.589917  |
| Cl | 3.365099  | 1.868537  | 1.119963  |
| O  | 0.948147  | 2.387117  | -0.865838 |
| Cl | -0.700379 | -0.298696 | -1.476361 |
| Br | -1.914963 | 1.527457  | 0.717059  |

2,4-dichloro-5-hydroxycyclopent-4-ene-1,3-dione

E(UB3LYP)=

G3 Enthalpy= -1336.146851

G3 Free Energy= -1336.193430

|    |           |           |           |
|----|-----------|-----------|-----------|
| C  | -0.301693 | 0.736604  | 0.480483  |
| C  | 0.046714  | -0.347520 | 1.351693  |
| C  | 1.567710  | -0.158062 | 1.640036  |
| C  | 1.939354  | 1.015542  | 0.904984  |
| C  | 0.826497  | 1.611316  | 0.169074  |
| O  | -0.642064 | -1.250911 | 1.804812  |
| O  | 2.239641  | -0.891576 | 2.351690  |
| Cl | 3.535799  | 1.677186  | 0.877548  |
| O  | 0.836983  | 2.613172  | -0.544847 |
| Cl | -1.888887 | 1.002045  | -0.150114 |

2,2,4-trichloro-5-hydroxycyclopent-4-ene-1,3-dione

E(RB3LYP)= -1797.069377

G3 Enthalpy= -1796.240621

G3 Free Energy= -1796.287614

|   |           |           |          |
|---|-----------|-----------|----------|
| C | -0.296052 | 0.509704  | 0.088800 |
| C | 0.109638  | -0.498925 | 1.179841 |
| C | 1.511390  | -0.111974 | 1.669853 |
| C | 1.865435  | 1.031370  | 0.906106 |

|    |           |           |           |
|----|-----------|-----------|-----------|
| C  | 0.901209  | 1.482930  | -0.037864 |
| O  | -0.561147 | -1.417482 | 1.571404  |
| O  | 2.116550  | -0.726660 | 2.543031  |
| Cl | 3.390487  | 1.847410  | 1.101222  |
| O  | 0.932510  | 2.422072  | -0.820091 |
| Cl | -0.603260 | -0.345883 | -1.484872 |
| Cl | -1.804009 | 1.399668  | 0.575301  |

-----  
Water  
-----

Br  
E(UB3LYP)= -2574.10709896  
G3 Enthalpy= -2573.517915  
G3 Free Energy= -2573.537105  
Br 0.000000 0.000000 0.000000

Cl  
E(UB3LYP)= -460.168019667  
G3 Enthalpy= -459.991276  
G3 Free Energy= -460.009313  
Cl 0.000000 0.000000 0.000000

*N*-Bromosuccinimide  
E(RB3LYP)= -2934.293132  
G3 Enthalpy= -2933.382933  
G3 Free Energy= -2933.423783  
N -0.099298 0.405858 0.270263  
C 0.119789 -0.349781 1.435927

|    |           |           |           |
|----|-----------|-----------|-----------|
| C  | 1.520223  | 0.005806  | 1.919244  |
| C  | 2.066864  | 1.033269  | 0.915384  |
| C  | 0.965503  | 1.238890  | -0.117085 |
| O  | -0.659943 | -1.117020 | 1.929992  |
| H  | 2.107861  | -0.913053 | 1.965112  |
| H  | 1.441027  | 0.391571  | 2.937391  |
| H  | 2.964383  | 0.696586  | 0.393075  |
| H  | 2.296795  | 2.001160  | 1.364880  |
| O  | 0.977506  | 1.959455  | -1.076972 |
| Br | -1.691426 | 0.310237  | -0.694791 |

#### Succinimide

E(UB3LYP)= -360.086071

G3 Enthalpy= -359.758891

G3 Free Energy= -359.796824

|   |           |           |           |
|---|-----------|-----------|-----------|
| N | -0.220361 | 0.665565  | 0.468021  |
| C | 0.130419  | -0.312602 | 1.419633  |
| C | 1.529934  | 0.010505  | 1.932251  |
| C | 2.076486  | 1.043261  | 0.927656  |
| C | 0.951429  | 1.215850  | -0.088226 |
| O | -0.597511 | -1.219563 | 1.751831  |
| H | 2.108007  | -0.914146 | 1.967836  |
| H | 1.455816  | 0.396665  | 2.950506  |
| H | 2.972554  | 0.712404  | 0.400670  |
| H | 2.294688  | 2.011431  | 1.382324  |
| O | 0.999250  | 1.743371  | -1.175292 |

#### 2,2,4-tribromo-5-hydroxycyclopent-4-ene-1,3-dione

E(RB3LYP)= -8138.907216

G3 Enthalpy= -8136.833954

G3 Free Energy= -8136.884931

|    |           |           |           |
|----|-----------|-----------|-----------|
| C  | -0.296738 | 0.502392  | 0.096101  |
| C  | 0.105282  | -0.495222 | 1.182309  |
| C  | 1.509514  | -0.114692 | 1.664918  |
| C  | 1.870861  | 1.024654  | 0.911793  |
| C  | 0.896725  | 1.471712  | -0.024288 |
| O  | -0.553814 | -1.416330 | 1.593030  |
| O  | 2.108721  | -0.743578 | 2.539506  |
| Br | 3.532076  | 1.906717  | 1.121242  |
| O  | 0.928183  | 2.420583  | -0.800006 |
| Br | -0.600888 | -0.441258 | -1.620354 |
| Br | -1.937170 | 1.477251  | 0.628481  |

2,4-dibromo-5-hydroxycyclopent-4-ene-1,3-dione

E(UB3LYP)= -5564.735934

G3 Enthalpy= -5563.235408

G3 Free Energy= -5563.284883

|    |           |           |           |
|----|-----------|-----------|-----------|
| C  | -0.309453 | 0.734507  | 0.492283  |
| C  | 0.049539  | -0.347651 | 1.352569  |
| C  | 1.567640  | -0.165777 | 1.629730  |
| C  | 1.945882  | 1.006084  | 0.906310  |
| C  | 0.824399  | 1.601213  | 0.186533  |
| O  | -0.627595 | -1.259670 | 1.815762  |
| O  | 2.230812  | -0.918299 | 2.335827  |
| Br | 3.681081  | 1.718210  | 0.870270  |
| O  | 0.833070  | 2.610994  | -0.521568 |
| Br | -2.035321 | 1.028186  | -0.182355 |

2,4-dibromo-2-chloro-5-hydroxycyclopent-4-ene-1,3-dione

E(RB3LYP)= -6024.986092

G3 Enthalpy= -6023.327575

G3 Free Energy= -6023.377076

|    |           |           |           |
|----|-----------|-----------|-----------|
| C  | -0.305215 | 0.515554  | 0.086800  |
| C  | 0.111197  | -0.496989 | 1.157419  |
| C  | 1.486849  | -0.078416 | 1.683232  |
| C  | 1.857556  | 1.047530  | 0.913575  |
| C  | 0.902167  | 1.468358  | -0.052258 |
| O  | -0.517564 | -1.461615 | 1.511188  |
| O  | 2.068518  | -0.680264 | 2.588401  |
| Br | 3.507225  | 1.946253  | 1.142517  |
| O  | 0.950076  | 2.385166  | -0.864687 |
| Cl | -0.690591 | -0.296785 | -1.472705 |
| Br | -1.898498 | 1.528996  | 0.722448  |

4-bromo-2-chloro-5-hydroxycyclopent-4-ene-1,3-dione

E(UB3LYP)= -3450.814951

G3 Enthalpy= -3449.729900

G3 Free Energy= -3449.777563

|    |           |           |           |
|----|-----------|-----------|-----------|
| C  | -0.293230 | 0.734799  | 0.484138  |
| C  | 0.064012  | -0.340880 | 1.354057  |
| C  | 1.578101  | -0.153806 | 1.638870  |
| C  | 1.956851  | 1.014489  | 0.910915  |
| C  | 0.838781  | 1.602215  | 0.180302  |
| O  | -0.614118 | -1.251679 | 1.818805  |
| O  | 2.244530  | -0.897579 | 2.352269  |
| Cl | 3.545255  | 1.673001  | 0.883171  |
| O  | 0.855529  | 2.608289  | -0.533491 |
| Br | -2.015656 | 1.018947  | -0.203677 |

2-bromo-2,4-dichloro-5-hydroxycyclopent-4-ene-1,3-dione

E(RB3LYP)= -3911.058619

G3 Enthalpy= -3909.821339

G3 Free Energy= -3909.869501

|    |           |           |           |
|----|-----------|-----------|-----------|
| C  | -0.296052 | 0.509704  | 0.088800  |
| C  | 0.109638  | -0.498925 | 1.179841  |
| C  | 1.511390  | -0.111974 | 1.669853  |
| C  | 1.865435  | 1.031370  | 0.906106  |
| C  | 0.901209  | 1.482930  | -0.037864 |
| O  | -0.561147 | -1.417482 | 1.571404  |
| O  | 2.116550  | -0.726660 | 2.543031  |
| Cl | 3.390487  | 1.847410  | 1.101222  |
| O  | 0.932510  | 2.422072  | -0.820091 |
| Cl | -0.603260 | -0.345883 | -1.484872 |
| Br | -2.099307 | 1.573947  | 0.670571  |

2,4-dichloro-5-hydroxycyclopent-4-ene-1,3-dione

E(UB3LYP)= -1336.893953

G3 Enthalpy= -1336.223679

G3 Free Energy= -1336.270152

|    |           |           |           |
|----|-----------|-----------|-----------|
| C  | -0.305319 | 0.736923  | 0.478913  |
| C  | 0.051330  | -0.339339 | 1.347266  |
| C  | 1.563336  | -0.151406 | 1.633553  |
| C  | 1.943118  | 1.017032  | 0.905332  |
| C  | 0.826710  | 1.603393  | 0.173685  |
| O  | -0.632442 | -1.247957 | 1.809457  |
| O  | 2.229562  | -0.895073 | 2.347563  |
| Cl | 3.531611  | 1.675953  | 0.879774  |
| O  | 0.837121  | 2.609032  | -0.541582 |
| Cl | -1.884973 | 0.999238  | -0.148604 |

2,2,4-trichloro-5-hydroxycyclopent-4-ene-1,3-dione

E(RB3LYP)= -1797.144113

G3 Enthalpy= -1796.314349

G3 Free Energy= -1796.361352

|    |           |           |           |
|----|-----------|-----------|-----------|
| C  | -0.300685 | 0.509438  | 0.086563  |
| C  | 0.109719  | -0.490685 | 1.177547  |
| C  | 1.506899  | -0.108384 | 1.660687  |
| C  | 1.867261  | 1.031323  | 0.906164  |
| C  | 0.897712  | 1.475776  | -0.032684 |
| O  | -0.555255 | -1.411744 | 1.578497  |
| O  | 2.113079  | -0.731222 | 2.536275  |
| Cl | 3.387730  | 1.845324  | 1.100484  |
| O  | 0.930880  | 2.421879  | -0.812403 |
| Cl | -0.594273 | -0.348528 | -1.480268 |
| Cl | -1.800314 | 1.399052  | 0.571869  |

Supplementary figures

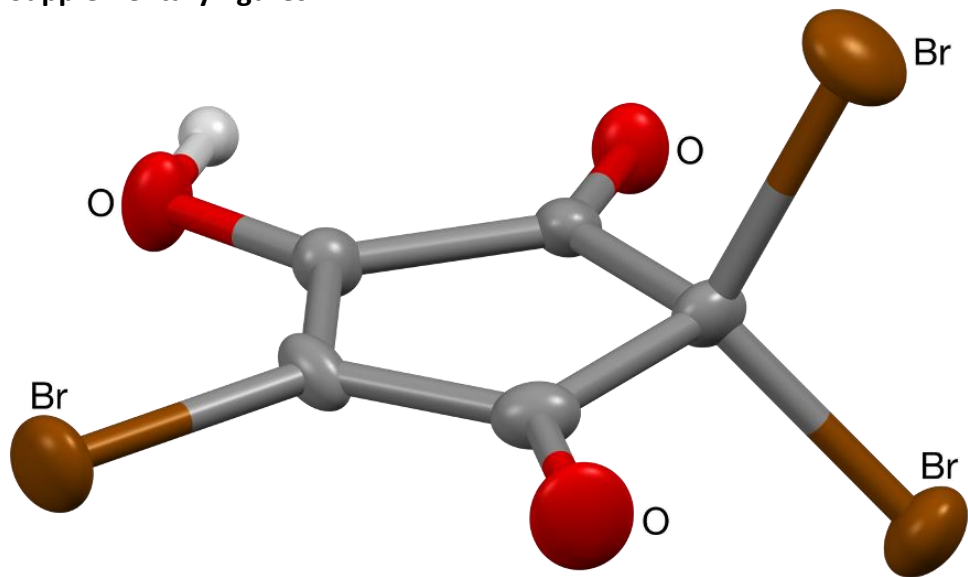

Figure S1: The crystal structure of TBHCD (50% probability ellipsoids).

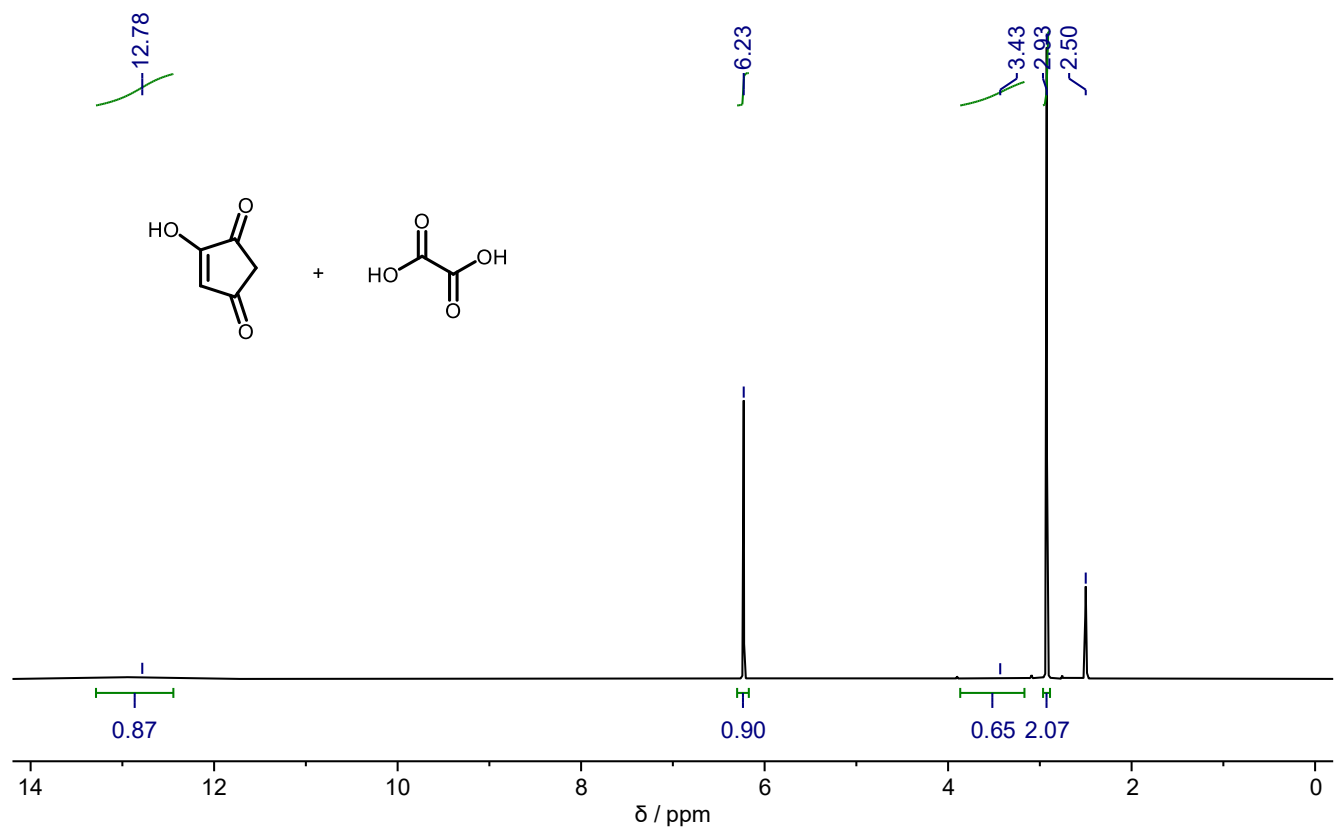

Figure S2: <sup>1</sup>H NMR spectrum of oxalic acid contaminated 4-hydroxycyclopent-4-ene-1,3-dione (**2**) (400 MHz, DMSO-*d*<sub>6</sub>)

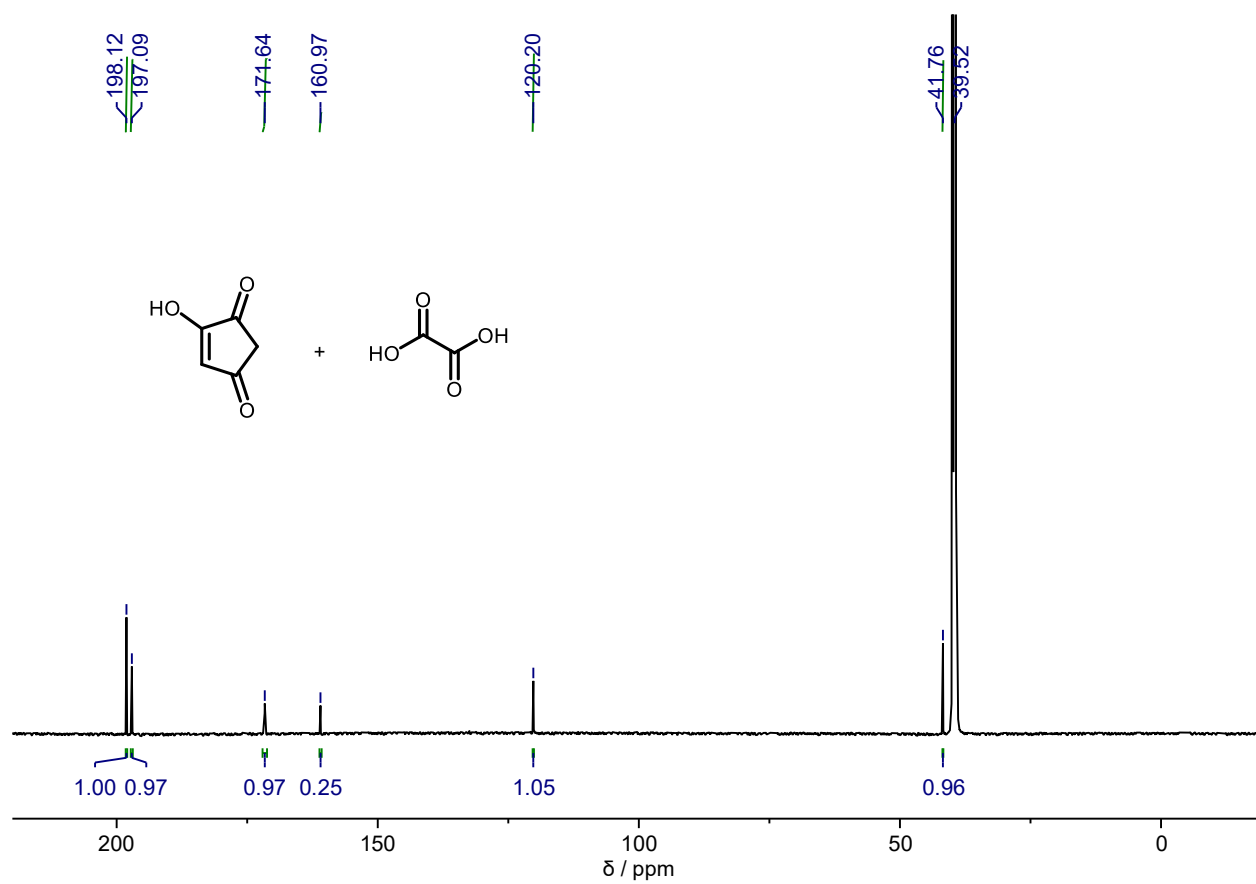

Figure S3:  $^{13}\text{C}\{^1\text{H}\}$  NMR inverse-gated spectrum of oxalic acid contaminated 4-hydroxycyclopent-4-ene-1,3-dione (2) (126 MHz, DMSO- $d_6$ )

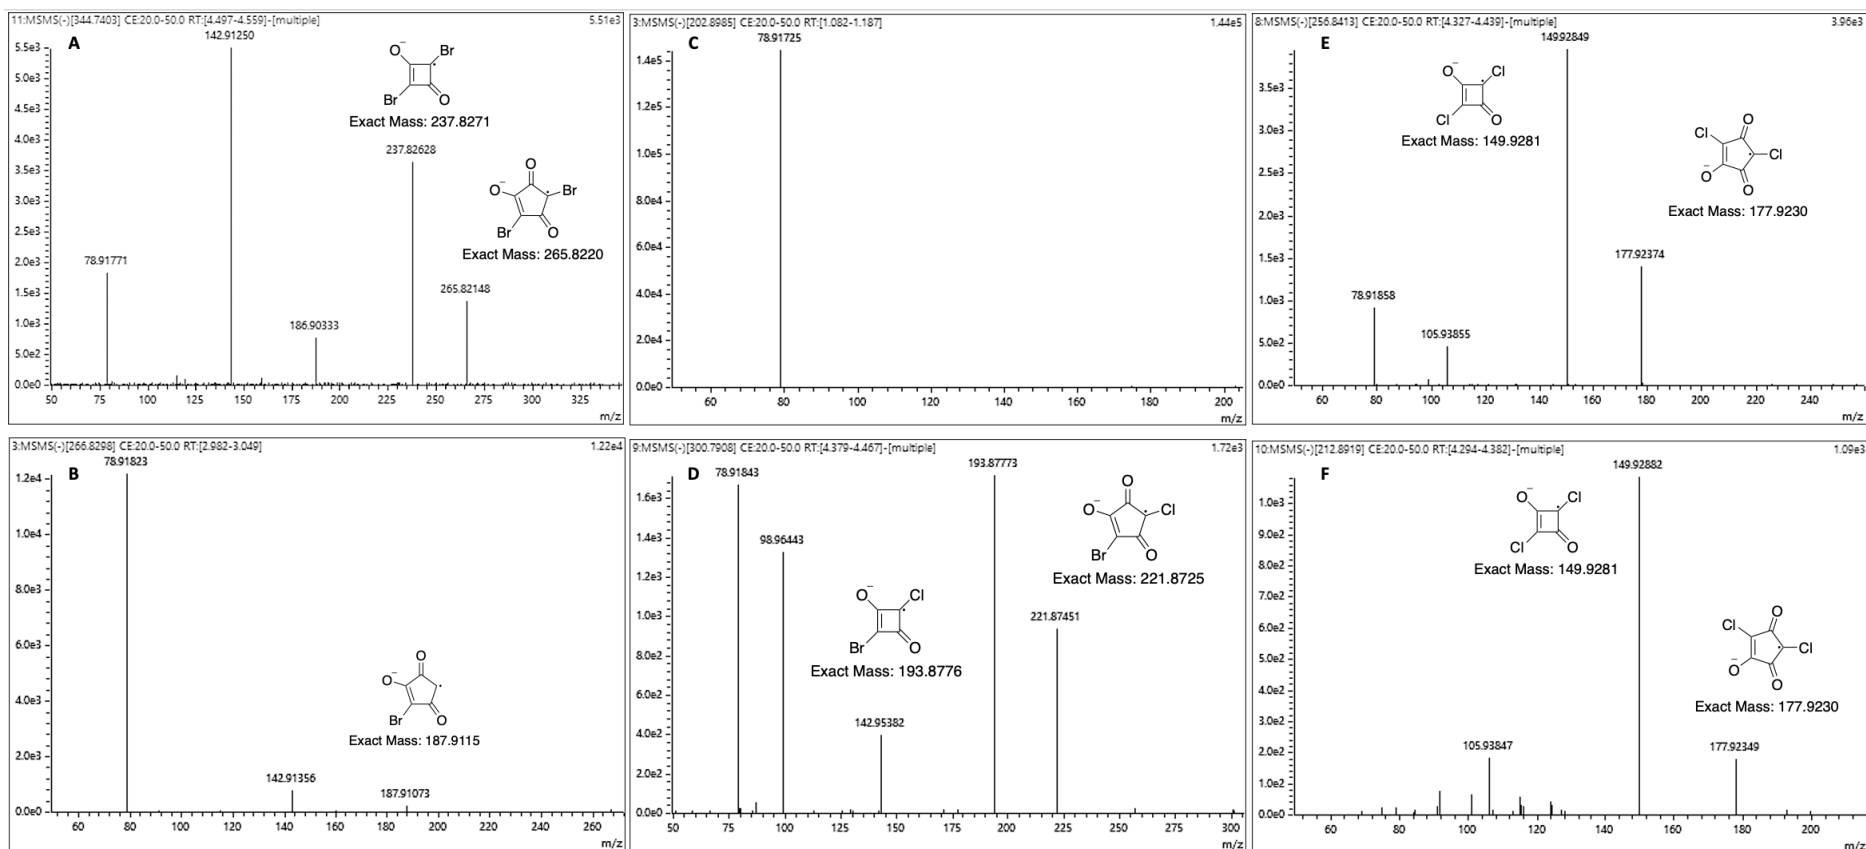

Figure S4. Product ion scan spectra of 2,2,4-tribromo-5-hydroxycyclopent-4-ene-1,3-dione (A), 2,4-dibromo-5-hydroxycyclopent-4-ene-1,3-dione (B), 4-bromo-5-hydroxycyclopent-4-ene-1,2,3-trione (C), 2,4-dibromo-2-chloro or 2,2-dibromo-4-chloro-5-hydroxycyclopent-4-ene-1,3-dione (D), 2-bromo-2,4-dichloro-5-hydroxycyclopent-4-ene-1,3-dione (E) and 2,2,4-trichloro-5-hydroxycyclopent-4-ene-1,3-dione (F), with structures and exact masses of odd-electrons species present in the spectra.

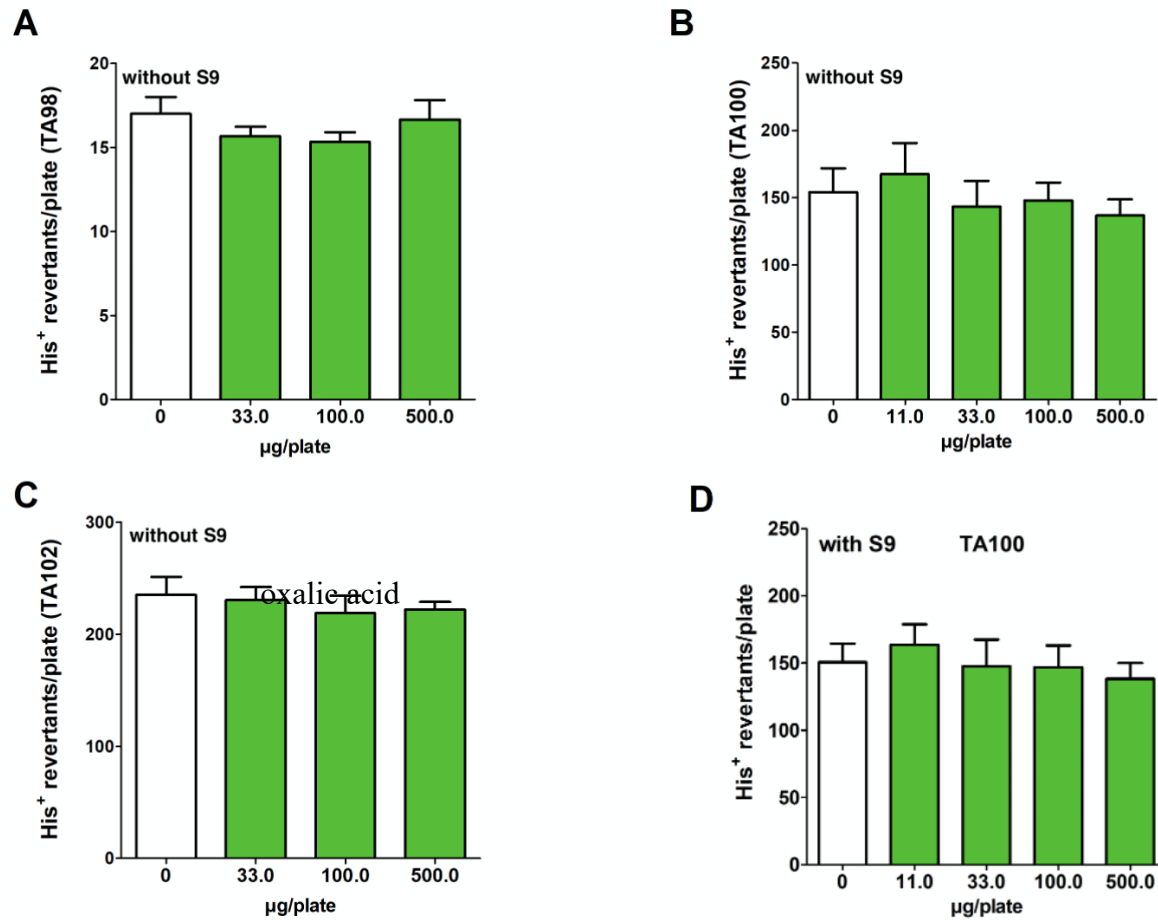

Figure S5: results of a representative experiment reporting mutagenic activities dibromomethanesulfonic acid with Salmonella strains TA98 (A), TA100 with (B) and TA102 (C) without metabolic activation, as well as TA100 with metabolic activation (D). Columns indicate mean  $\pm$  SD from three plates. \* positive according to the two-fold rule. Individual values in Table S8

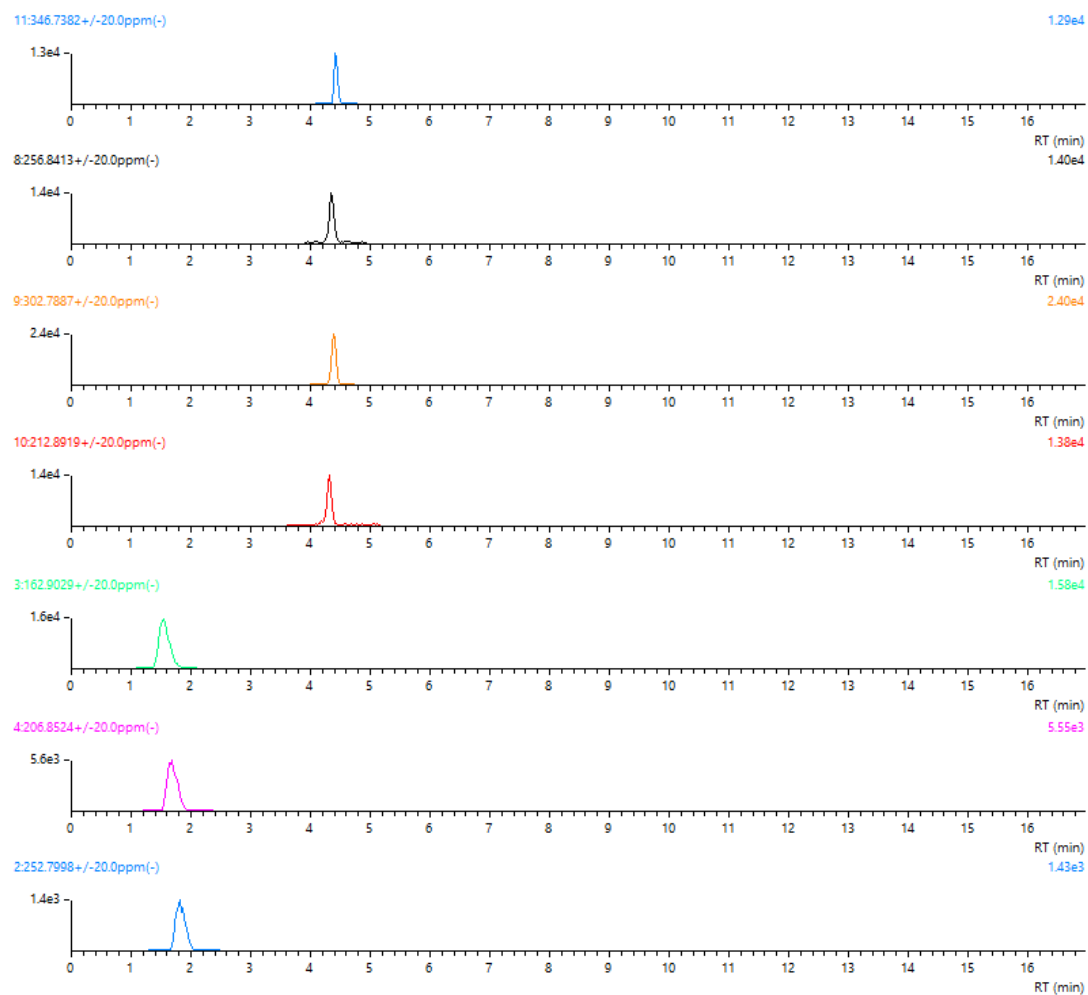

Figure S6: Extracted ion chromatograms of analytes in an unspiked London tap water sample (from top to bottom): 2,2,4-tribromo-5-hydroxycyclopent-4-ene-1,3-dione ( $t_R=4.4$  min), 2-bromo-2,4-dichloro-5-hydroxycyclopent-4-ene-1,3-dione ( $t_R=4.3$  min), 2,4-dibromo-2-chloro or 2,2-dibromo-4-chloro-5-hydroxycyclopent-4-ene-1,3-dione ( $t_R=4.4$  min), 2,2,4-trichloro-5-hydroxycyclopent-4-ene-1,3-dione (TCHCD,  $t_R=4.3$  min), dichloromethanesulfonic acid ( $t_R=1.6$  min) and bromochloromethanesulfonic acid ( $t_R=1.7$  min) and dibromomethanesulfonic acid ( $t_R=1.8$  min).

## Supplementary Tables

Table S1: Instrumental method details

|                        |                                                                                                                                                         |     |                                                                                                                                                 |                    |                       |                       |                     |
|------------------------|---------------------------------------------------------------------------------------------------------------------------------------------------------|-----|-------------------------------------------------------------------------------------------------------------------------------------------------|--------------------|-----------------------|-----------------------|---------------------|
| Instrument             | Shimadzu LC-MS 9030 LC-QTOF, with Nexera XR LC system and ESI source                                                                                    |     | MS: all events duration 100 ms                                                                                                                  |                    |                       |                       |                     |
| Column                 | Waters Atlantis Premier BEH C18 AX (2.5 mm, 2.1x100mm) with pre-column containing identical stationary phase (VanGuard FIT Cartridge, 2.5 µm, 2.1x5 mm) |     | Event (all events duration is 100 ms)                                                                                                           | scan starts at m/z | scan starts at m/z    | Event RT starts (min) | Event RT ends (min) |
| Mobile Phase A         | 5 mM ammonium hydrogen carbonate adjusted to pH 6.9 with acetic acid in water                                                                           |     | Full Scan                                                                                                                                       | 50.0000            | 920.0000              | 0.999                 | 6                   |
| Mobile Phase B         | 5 mM ammonium hydrogen carbonate adjusted to pH 8.9 with diethylamine in water:acetonitrile 1:9                                                         |     | Dibromomethanesulfonic acid                                                                                                                     | 252.7498           | 252.8498              | 1                     | 2.6                 |
| Flow                   | 0.4 mL/min                                                                                                                                              |     | Dichlorometane sulfonic acid                                                                                                                    | 162.8529           | 162.9529              | 1                     | 2.6                 |
| Gradient               | Time (min)                                                                                                                                              | %B  | Bromochloromethanesulfonic acid                                                                                                                 | 206.8024           | 206.9024              | 1                     | 2.6                 |
|                        | 0                                                                                                                                                       | 5   | 4-bromo-5-hydroxycyclopent-4-ene-1,2,3-trione                                                                                                   | 202.8485           | 202.9485              | 1                     | 2.6                 |
|                        | 1.1                                                                                                                                                     | 5   | Dibromo-HCD                                                                                                                                     | 268.7777           | 268.8777              | 2.2                   | 4                   |
|                        | 5                                                                                                                                                       | 50  | Bromo-dichloro-HCD                                                                                                                              | 256.7913           | 256.8913              | 3.6                   | 6                   |
|                        | 5.5                                                                                                                                                     | 100 | Chloro-dibromo-HCD                                                                                                                              | 302.7387           | 302.8387              | 3.6                   | 6                   |
|                        | 7.25                                                                                                                                                    | 100 | Trichloro-HCD                                                                                                                                   | 212.8419           | 212.9419              | 3.6                   | 6                   |
|                        | 7.3                                                                                                                                                     | 5   | Tribromo-HCD                                                                                                                                    | 346.6882           | 346.7882              | 3.8                   | 6                   |
| Total run time         | 9.3 min                                                                                                                                                 |     | Targeted MS/MS (for confirmation only)                                                                                                          |                    |                       |                       |                     |
| Injection volume       | 50 µL                                                                                                                                                   |     | Product Ion Scan with precursor ion and scanning set for target parent; Collision Energy ramp 35 ± 15 V, events time 150 ms, Q1 Unit Resolution |                    |                       |                       |                     |
| Injection speed        | 1 µL/sec                                                                                                                                                |     | Event                                                                                                                                           | Precursor ion      | Event RT starts (min) | Event RT ends (min)   |                     |
|                        |                                                                                                                                                         |     | Dibromomethanesulfonic acid                                                                                                                     | 250.8019           | 1                     | 2.6                   |                     |
| Interface Voltage      | -1 kV                                                                                                                                                   |     | Dichlorometane sulfonic acid                                                                                                                    | 162.9029           | 1                     | 2.6                   |                     |
| Nebulizing gas flow    | 3.0 L/min                                                                                                                                               |     | Bromochloromethanesulfonic acid                                                                                                                 | 206.8524           | 1                     | 2.6                   |                     |
| Heating Gas Flow       | 3.0 L/min                                                                                                                                               |     | 4-bromo-5-hydroxycyclopent-4-ene-1,2,3-trione                                                                                                   | 202.8485           | 1                     | 2.6                   |                     |
| Interface Temperature  | 250 °C                                                                                                                                                  |     | Dibromo-HCD                                                                                                                                     | 266.8298           | 2.2                   | 4                     |                     |
| Drying gas flow        | 10.0 L/min                                                                                                                                              |     | Bromo-dichloro-HCD                                                                                                                              | 256.8413           | 3.6                   | 6                     |                     |
| DL Temperature         | 150 °C                                                                                                                                                  |     | Chloro-dibromo-HCD                                                                                                                              | 300.7908           | 3.6                   | 6                     |                     |
| Heat Block Temperature | 350 °C                                                                                                                                                  |     | Trichloro-HCD                                                                                                                                   | 212.8919           | 3.6                   | 6                     |                     |
| Mass Calibration       | External with NaI                                                                                                                                       |     | Tribromo-HCD                                                                                                                                    | 344.7403           | 3.8                   | 6                     |                     |

Table S2: drinking water sampling locations (London Boroughs) and dates.

| <b>House Number</b> | <b>Borough</b>         | <b>Sampling dates</b> |
|---------------------|------------------------|-----------------------|
| 1                   | Brent                  | 14/08/2023            |
|                     |                        | 30/08/2023            |
|                     |                        | 12/09/2023            |
| 2                   | Kensington and Chelsea | 14/08/2023            |
|                     |                        | 31/08/2023            |
|                     |                        | 12/09/2023            |
| 3                   | Islington              | 15/08/2023            |
|                     |                        | 30/08/2023            |
|                     |                        | 13/09/2023            |
| 4                   | Wandsworth             | 15/08/2023            |
|                     |                        | 31/08/2023            |
|                     |                        | 12/09/2023            |
| 5                   | Ealing                 | 15/08/2023            |
|                     |                        | 31/08/2023            |
|                     |                        | 12/09/2023            |
| 6                   | Kensington and Chelsea | 15/08/2023            |
|                     |                        | 30/08/2023            |
|                     |                        | 12/09/2023            |
| 7                   | Wandsworth             | 15/08/2023            |
|                     |                        | 31/08/2023            |
|                     |                        | 13/09/2023            |

Table S3: 2,2,4-tribromo-5-hydroxycyclopent-4-ene-1,3-dione (TBHCD,) and dibromomethanesulfonic acid (DBMSA) concentrations quantified in London drinking water samples, followed by semi quantitative results for 2-bromo-2,4-dichloro-5-hydroxycyclopent-4-ene-1,3-dione (BDCHCD) (E), 2,4-dibromo-2-chloro or 2,2-dibromo-4-chloro-5-hydroxycyclopent-4-ene-1,3-dione (CDBHCD), 2,2,4-trichloro-5-hydroxycyclopent-4-ene-1,3-dione (TCHCD), dichloromethanesulfonic acid (DCMSA) and bromochloromethanesulfonic acid (BCMSA). Tap water from seven homes were sampled biweekly three times.

| House Number   | TBHCD      | DBMSA      | BDCHCD (semi-quantitative) | CDBHCD (semi-quantitative) | TCHCD (semi-quantitative) | DCMSA (semi-quantitative) | BCMSA (semi-quantitative) |
|----------------|------------|------------|----------------------------|----------------------------|---------------------------|---------------------------|---------------------------|
| 1              | 49         | 116        | 78                         | 122                        | 76                        | 1375                      | 488                       |
|                | 166        | 391        | 204                        | 416                        | 191                       | 3017                      | 1195                      |
|                | 137        | 246        | 163                        | 331                        | 113                       | 2089                      | 881                       |
| 2              | 141        | 777        | 183                        | 359                        | 163                       | 7152                      | 2507                      |
|                | 136        | 409        | 142                        | 308                        | 141                       | 2964                      | 1227                      |
|                | 160        | 435        | 119                        | 314                        | 90                        | 2528                      | 1192                      |
| 3              | 148        | 409        | 145                        | 305                        | 170                       | 1724                      | 640                       |
|                | 130        | 321        | 118                        | 214                        | 116                       | 2480                      | 980                       |
|                | 154        | 395        | 136                        | 271                        | 90                        | 3159                      | 1268                      |
| 4              | 83         | 152        | 182                        | 261                        | 231                       | 3305                      | 967                       |
|                | 71         | 269        | 123                        | 197                        | 157                       | 2483                      | 931                       |
|                | 62         | 293        | 74                         | 142                        | 66                        | 1758                      | 846                       |
| 5              | 139        | 285        | 198                        | 330                        | 190                       | 4250                      | 1444                      |
|                | 127        | 226        | 167                        | 323                        | 146                       | 2196                      | 873                       |
|                | 135        | 243        | 172                        | 346                        | 107                       | 2018                      | 861                       |
| 6              | 130        | 586        | 172                        | 343                        | 144                       | 10727                     | 3200                      |
|                | 134        | 356        | 147                        | 315                        | 143                       | 2997                      | 1192                      |
|                | 138        | 361        | 128                        | 295                        | 88                        | 2511                      | 1114                      |
| 7              | 108        | 65         | 184                        | 269                        | 184                       | 2391                      | 626                       |
|                | 65         | 260        | 136                        | 193                        | 169                       | 2821                      | 1039                      |
|                | 139        | 240        | 172                        | 349                        | 133                       | 2494                      | 976                       |
| <b>Average</b> | <b>122</b> | <b>326</b> | <b>150</b>                 | <b>286</b>                 | <b>138</b>                | <b>3164</b>               | <b>1164</b>               |

Table S4: 24 and 48 hours stability study in tap and ultrapure water (n=3, duplicate injection). Analyte degradation was expressed as average area percent decrease in comparison to time zero. The % relative standard deviation of Area% over all injections for each condition tested is also reported.

| Sample                                            | Storage Condition | Timepoint | TBHCD Area% Decrease in comparison to T0               | TBHD Area% %RSD |
|---------------------------------------------------|-------------------|-----------|--------------------------------------------------------|-----------------|
| Municipal water, spiked at 500 ng L <sup>-1</sup> | -18°C             | 24 hours  | No statistically significant difference with reference | 3               |
|                                                   | -18°C             | 48 hours  | -13                                                    | 3               |
|                                                   | 4°C               | 24 hours  | -12                                                    | 1               |
|                                                   | 4°C               | 48 hours  | -39                                                    | 5               |
|                                                   | Room Temperature  | 24 hours  | -85                                                    | 4               |
|                                                   | Room Temperature  | 48 hours  | -98                                                    | 11              |
| Ultrapure water, spiked at 500 ng L <sup>-1</sup> | 4°C               | 24 hours  | No statistically significant difference with reference | 1               |
|                                                   | 4°C               | 48 hours  | -5                                                     | 2               |

Table S5: Bond dissociation enthalpies and energies for n-bromosuccinimide and halogenated hydroxycyclopentenediones calculated in gas phase and water.

| Compound                                                       | Bond dissociation enthalpy (kcal mol <sup>-1</sup> ) |       | Bond dissociation free energy (kcal mol <sup>-1</sup> ) |       |
|----------------------------------------------------------------|------------------------------------------------------|-------|---------------------------------------------------------|-------|
|                                                                | Gas-phase                                            | Water | Gas-phase                                               | Water |
| <i>N</i> -bromosuccinimide                                     | 67.2                                                 | 66.6  | 57.4                                                    | 56.4  |
| 2,2,4-tribromo-5-hydroxycyclopent-4-ene-1,3-dione              | 52.7                                                 | 50.6  | 41.7                                                    | 39.5  |
| 2,4-dibromo-2-chloro-5-hydroxycyclopent-4-ene-1,3-dione (C-Br) | 52.5                                                 | 50    | 41.5                                                    | 39.2  |
| 2,4-dibromo-2-chloro-5-hydroxycyclopent-4-ene-1,3-dione (C-Cl) | 65.2                                                 | 63.3  | 54.1                                                    | 52    |
| 2-bromo-2,4-dichloro-5-hydroxycyclopent-4-ene-1,3-dione (C-Br) | 52.3                                                 | 50    | 41.4                                                    | 39.1  |
| 2-bromo-2,4-dichloro-5-hydroxycyclopent-4-ene-1,3-dione (C-Cl) | 64.9                                                 | 62.9  | 53.8                                                    | 51.8  |
| 2,2,4-trichloro-5-hydroxycyclopent-4-ene-1,3-dione             | 64.9                                                 | 62.4  | 53.8                                                    | 51.4  |

Table S6: Photodegradation of tribromo-HCD. Average area percent variations (n=3) during exposure to sunlight for 2,2,4-tribromo-5-hydroxycyclopent-4-ene-1,3-dione (TBHCD), 2,4-dibromo-5-hydroxycyclopent-4-ene-1,3-dione (DBHCD), 4-bromo-5-hydroxycyclopent-4-ene-1,2,3-trione (BHCT). Areas were measured in a solution 1000 ng L<sup>-1</sup> of tribromo-HCD in ultrapure water at various intervals of exposure to laboratory light. A% variations calculated as a ratio with TBHCD average area at T0. RH represents methanol in this case, and by extension dissolved organic matter in drinking water.

| <b>Minutes of exposure to natural light</b> | <b>TBHCD, Area% of T0</b> | <b>DBHCD, Area% formed since T0</b> | <b>BHTD, Area% formed since T0</b> |
|---------------------------------------------|---------------------------|-------------------------------------|------------------------------------|
| 0                                           | 100                       | 0                                   | 0                                  |
| 15                                          | 93                        | 5                                   | 1                                  |
| 30                                          | 90                        | 7                                   | 1                                  |
| 45                                          | 85                        | 10                                  | 2                                  |
| 60                                          | 81                        | 12                                  | 2                                  |
| 75                                          | 81                        | 11                                  | 2                                  |
| 90                                          | 73                        | 17                                  | 2                                  |

Table S7: pH-induced degradation of 2,2,4-tribromo-5-hydroxycyclopent-4-ene-1,3-dione. Average area percent variations (n=3) for 2,2,4-tribromo-5-hydroxycyclopent-4-ene-1,3-dione (TBHCD), 2,4-dibromo-5-hydroxycyclopent-4-ene-1,3-dione (DBHCD), 4-bromo-5-hydroxycyclopent-4-ene-1,2,3-trione (BHCT) after dilution at 1000 ng L<sup>-1</sup> in ultrapure water at pH 4, 7.4, 8.5 and 9. Solutions were stored in the dark at room temperature for 1 and 2 hours, each condition tested in triplicate. A% calculated as a ratio with TBHCD average area at T0.

| pH of the solution | Storage time (h) | TBHCD, Area% of T0 |               |             | DBHCD, Area% formed since T0 |               |             | BHCT, Area% formed since T0 |               |             |
|--------------------|------------------|--------------------|---------------|-------------|------------------------------|---------------|-------------|-----------------------------|---------------|-------------|
| 4                  | 1                | no                 | statistically | significant | no                           | statistically | significant | no                          | statistically | significant |
|                    |                  | difference with T0 |               |             | difference with T0           |               |             | difference with T0          |               |             |
| 4                  | 2                | no                 | statistically | significant | no                           | statistically | significant | no                          | statistically | significant |
|                    |                  | difference with T0 |               |             | difference with T0           |               |             | difference with T0          |               |             |
| 7.4                | 1                | no                 | statistically | significant | no                           | statistically | significant | no                          | statistically | significant |
|                    |                  | difference with T0 |               |             | difference with T0           |               |             | difference with T0          |               |             |
| 7.4                | 2                | no                 | statistically | significant | no                           | statistically | significant | no                          | statistically | significant |
|                    |                  | difference with T0 |               |             | difference with T0           |               |             | difference with T0          |               |             |
| 8.5                | 1                | 91                 |               |             | 4                            |               |             | 1                           |               |             |
| 8.5                | 2                | 81                 |               |             | 5                            |               |             | 1                           |               |             |
| 9                  | 1                | 73                 |               |             | 6                            |               |             | 2                           |               |             |
| 9                  | 2                | 58                 |               |             | 8                            |               |             | 3                           |               |             |

Table S8: individual datapoints for Salmonella/microsome assay for 2,2,4-tribromo-5-hydroxycyclopent-4-ene-1,3-dione (A) and dibromomethanesulfonic acid (B)

A:

| <b>Strain</b>         | <b>TA98 without S9</b>  |             |              |              |              |
|-----------------------|-------------------------|-------------|--------------|--------------|--------------|
| <b>µg/plate</b>       | <b>0</b>                | <b>33.0</b> | <b>100.0</b> | <b>500.0</b> |              |
| His+ revertants/plate | 18                      | 28          | 89           | 4            |              |
| His+ revertants/plate | 16                      | 29          | 131          | 8            |              |
| His+ revertants/plate | 17                      | 34          | 96           | 3            |              |
| <b>Strain</b>         | <b>TA100 without S9</b> |             |              |              |              |
| <b>µg/plate</b>       | <b>0</b>                | <b>11.0</b> | <b>33.0</b>  | <b>100.0</b> | <b>500.0</b> |
| His+ revertants/plate | 134                     | 223         | 470          | 964          | 0            |
| His+ revertants/plate | 160                     | 220         | 416          | 1054         | 0            |
| His+ revertants/plate | 168                     | 218         | 423          | 1048         | 0            |
| <b>Strain</b>         | <b>TA102 without S9</b> |             |              |              |              |
| <b>µg/plate</b>       | <b>0</b>                | <b>33.0</b> | <b>100.0</b> | <b>500.0</b> |              |
| His+ revertants/plate | 250                     | 310         | 520          | 15           |              |
| His+ revertants/plate | 238                     | 340         | 522          | 7            |              |
| His+ revertants/plate | 218                     | 327         | 502          | 8            |              |
| <b>Strain</b>         | <b>TA100 with S9</b>    |             |              |              |              |
| <b>µg/plate</b>       | <b>0</b>                | <b>11.0</b> | <b>33.0</b>  | <b>100.0</b> | <b>500.0</b> |
| His+ revertants/plate | 171                     | 176         | 170          | 540          | 406          |
| His+ revertants/plate | 143                     | 141         | 156          | 500          | 426          |
| His+ revertants/plate | 145                     | 176         | 157          | 660          | 411          |

B:

| <b>Strain</b>         | <b>TA98 without S9</b> |             |              |              |
|-----------------------|------------------------|-------------|--------------|--------------|
| <b>µg/plate</b>       | <b>0</b>               | <b>33.0</b> | <b>100.0</b> | <b>500.0</b> |
| His+ revertants/plate | 18                     | 16          | 15           | 16           |
| His+ revertants/plate | 16                     | 15          | 16           | 18           |
| His+ revertants/plate | 17                     | 16          | 15           | 16           |

  

| <b>Strain</b>         | <b>TA100 without S9</b> |             |             |              |              |
|-----------------------|-------------------------|-------------|-------------|--------------|--------------|
| <b>µg/plate</b>       | <b>0</b>                | <b>11.0</b> | <b>33.0</b> | <b>100.0</b> | <b>500.0</b> |
| His+ revertants/plate | 134                     | 157         | 129         | 133          | 142          |
| His+ revertants/plate | 160                     | 194         | 136         | 154          | 123          |
| His+ revertants/plate | 168                     | 151         | 165         | 157          | 145          |

  

| <b>Strain</b>         | <b>TA102 without S9</b> |             |              |              |
|-----------------------|-------------------------|-------------|--------------|--------------|
| <b>µg/plate</b>       | <b>0</b>                | <b>33.0</b> | <b>100.0</b> | <b>500.0</b> |
| His+ revertants/plate | 250                     | 224         | 220          | 224          |
| His+ revertants/plate | 218                     | 244         | 234          | 228          |
| His+ revertants/plate | 238                     | 224         | 203          | 215          |

  

| <b>Strain</b>         | <b>TA100 with S9</b> |             |             |              |              |
|-----------------------|----------------------|-------------|-------------|--------------|--------------|
| <b>µg/plate</b>       | <b>0</b>             | <b>11.0</b> | <b>33.0</b> | <b>100.0</b> | <b>500.0</b> |
| His+ revertants/plate | 162                  | 180         | 152         | 134          | 144          |
| His+ revertants/plate | 135                  | 161         | 165         | 142          | 146          |
| His+ revertants/plate | 155                  | 150         | 126         | 165          | 125          |
